# Supplementary material for: Thermodormancy and Germination Response to Temperature of Pyrus ussuriensis Seeds
Source: MDPI journal article supplement (doi:10.3390/agronomy14030475), 2024-02-27
Supplement: s1 [file s1]

*Supplementary materials*

**Thermodormancy and germination response to temperature of *Pyrus ussuriensis* seeds**

**Zhuolin Liu<sup>1,2</sup>, Mingyue Li<sup>1,2</sup>, Meiru Zhu<sup>1,2</sup>, Rosana López<sup>3</sup>, Roberto L Salomón<sup>3</sup>, Peng Zhang<sup>1,2,\*</sup>**

<sup>1</sup> College of Forestry, Northeast Forestry University, Harbin 150040, China; liuzhuolin2023@163.com (Z. L.); mingyue09222022@163.com (M. L.); zhumeiru2022@163.com (M. Z.); zhangpeng@nefu.edu.cn (P. Z.)

<sup>2</sup> Key Laboratory of Sustainable Forest Ecosystem Management—Ministry of Education, Northeast Forestry University, Harbin 150040, China.; liuzhuolin2023@163.com (Z. L.); mingyue09222022@163.com (M. L.); zhumeiru2022@163.com (M. Z.); zhangpeng@nefu.edu.cn (P. Z.)

<sup>3</sup> Universidad Politécnica de Madrid, Department of Natural Systems and Resources, Research group FORESCENT, Ciudad Universitaria s/n, 28040 Madrid, Spain; rosana.lopez@upm.es (R. L.); roberto.salomon@upm.es (R. S.)

\* Correspondence: zhangpeng@nefu.edu.cn

Figure S1. Photographs of the germination behaviour of dormant, non-dormant and thermodormant *P. ussuriensis* seeds in gibberellic acid at low (A) and high (B) concentrations and in abscisic acid at low (C) and high (D) concentrations.

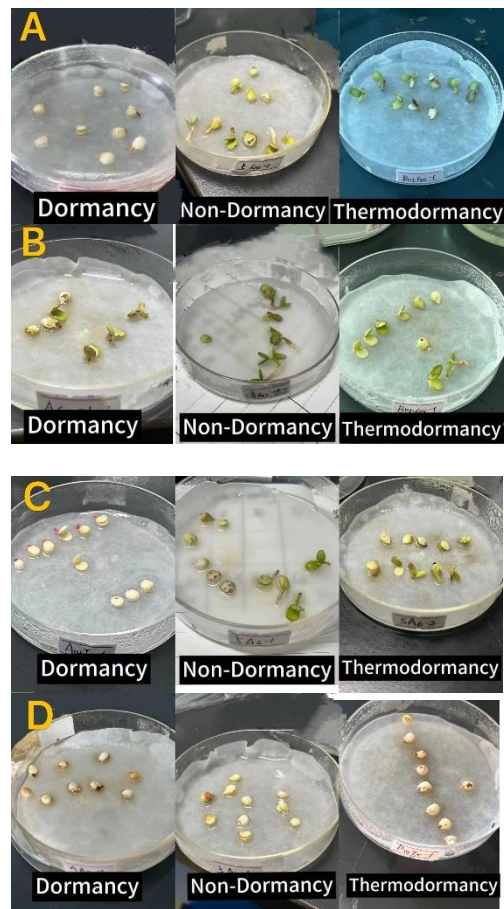

**Table S1.** Degrees of freedom and p values of the two-way analysis of variance of the effect of dormancy state, solution treatment, and its interaction on the germination percentage of isolated embryos of *P. ussuriensis* seeds.

| Source of Variation     | df | p value |
|-------------------------|----|---------|
| Dormancy state          | 2  | < 0.001 |
| Solution                | 5  | < 0.001 |
| Dormancy state:Solution | 10 | > 0.05  |

**Table S2.** Degrees of freedom and p values of the two-way analysis of variance of the effect of dormancy state, solution treatment, and its interaction treatment on the germination percentage of cabbage seeds.

| Source of Variation     | df | p value |
|-------------------------|----|---------|
| Dormancy state          | 2  | < 0.01  |
| Solution                | 3  | < 0.001 |
| Dormancy state:Solution | 6  | > 0.05  |
